# Supplementary material
Source: Springer Nature journal article supplement (https://www.springermedizin.de/resource/supplementary/12913_2012_2673_MOESM2_ESM.pdf/9531098)

**A**

**PROVISION OF INFORMATION FROM HEALTH STATUS MEASURES TO CLINICIANS**

- Alone or supplemented with management guidelines
- With or without training in interpretation of scores
- Fed back once or several times
- Graphical displays of scores or written summaries, with or without population norms, with or without previous scores

**B**

**Evidence: +**

**CHANGES TO DOCTOR PATIENT COMMUNICATION**

- Clinicians talk to patients about their feelings/health status
- Develop a shared view of treatment goals/health status/reason for the visit

**C**

**Evidence: +/-**

**MONITOR TREATMENT RESPONSE**

**D**

**Evidence: +/-**

**DETECT UNRECOGNISED PROBLEMS**

**E**

**Evidence: -**

**CHANGES TO PATIENT HEALTH BEHAVIOUR**

- Visit to the clinician
- Adherence to treatment

**F**

**Evidence: -**

**CHANGES TO CLINICIAN'S MANAGEMENT OF PATIENT**

- Changes to/initiation of treatment
- Referrals to other agencies
- Tests to investigate problem further
- Advice on problem management

**G**

**Evidence: -**

**IMPROVED PATIENT SATISFACTION**

**A**

**Evidence: +**

**IMPROVED HEALTH OUTCOMES**

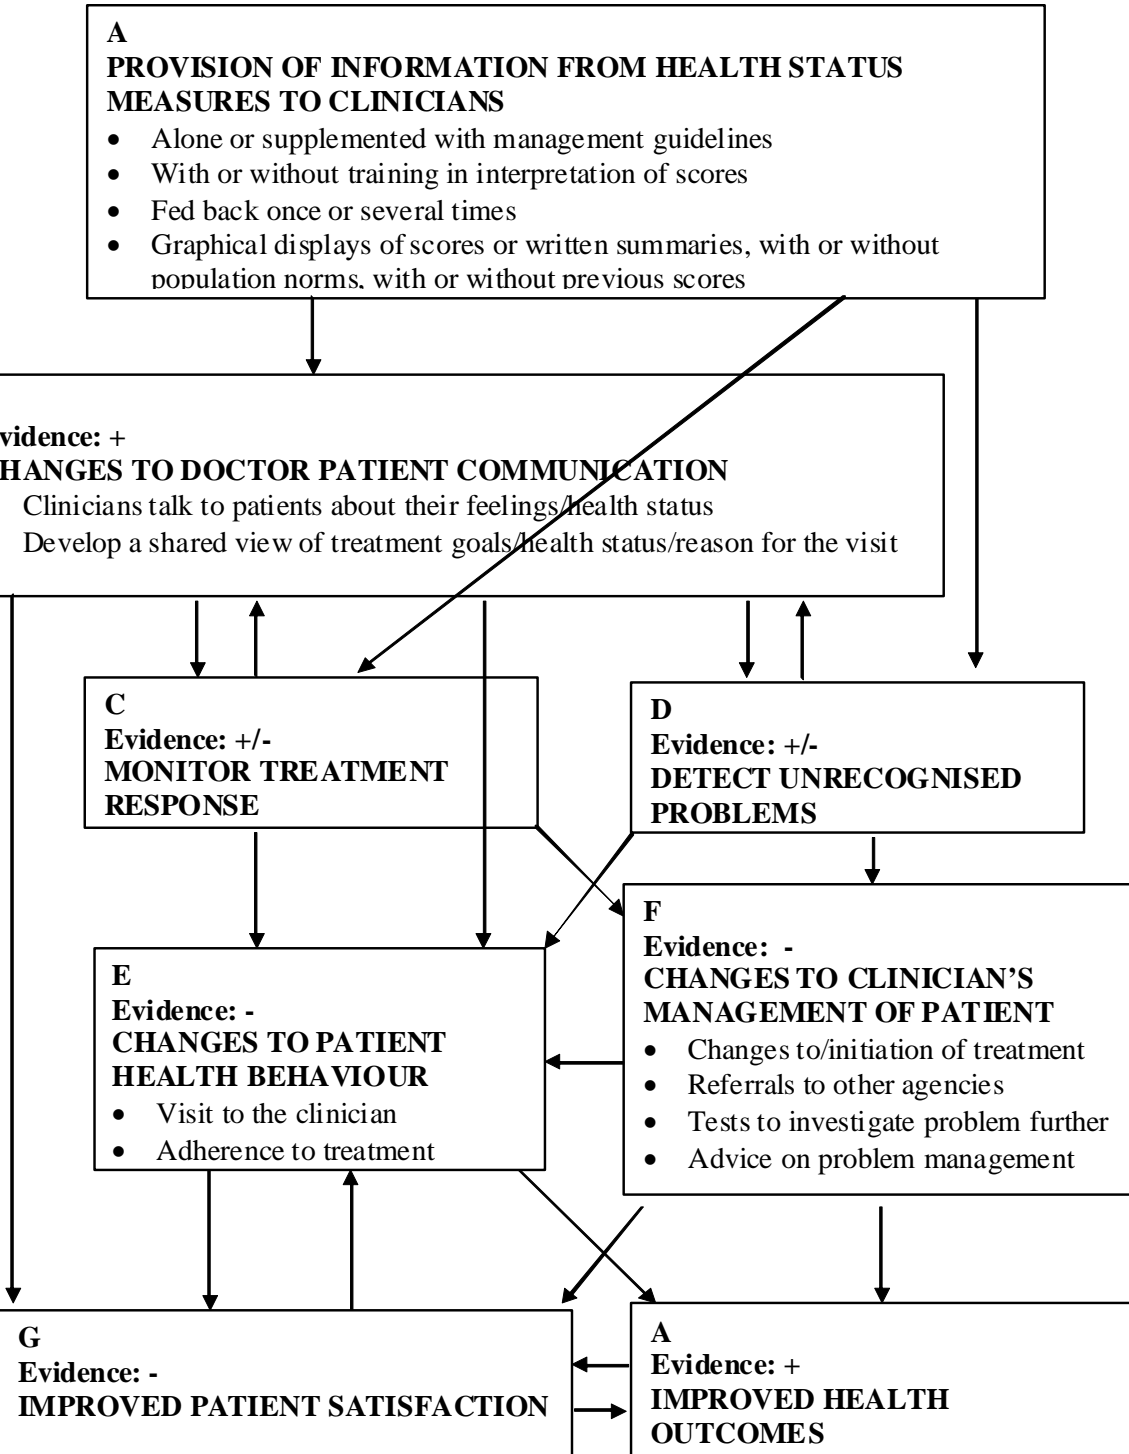

Supplement: MOESM2 [file 9531098]
